# Supplementary material for: A Toxicological Evaluation of Germanium Sesquioxide (Organic Germanium)
Source: J Toxicol. 2020 Apr 4;2020:6275625. doi: 10.1155/2020/6275625 (PMC7160733; doi:10.1155/2020/6275625)
Supplement: Supplementary Materials — Complete summary data tables for the 90-day repeated-dose oral toxicity study are available in Supplementary Material for the following parameters (reported as means ± standard deviations): body weights (female), body weight gain (female), food consumption (males and females), food efficiency (female), hematology (males and females), and absolute and relative (to brain and body weight) organ weights (males and females). [file 6275625.f1.xlsx]

## Sheet: 1.BW-F
Supplemental Table 1. Summary of body weight (females), 90-day study
Group‡			Body weight (g) on days
mg/kg bw/day			0	3	7	10	14	17	21	24	28	35	42	49	56	63	70	77	84	89
Control	Mean		154.7	163.9	175.4	182.6	189.5	192	198.2	202.7	205.8	216	222.8	226.7	231.3	236.5	239.8	241.3	241.5	245.3
	SD		6.27252	8.46496	10.4051	10.1237	9.94708	10.7909	11.8491	11.6146	10.9219	13.8002	13.6202	12.7371	12.8759	15.393	15.433	15.3554	14.5774	14.0321
500	Mean		157.9	164.3	174.3	179.9	186.9	193.6	201.3	207.1	210.8	217.9	224.1	229	235.9	235.8	238.5	241.1	244.9	248.4
	SD		7.92254	10.133	11.5667	11.9206	10.6505	12.0481	11.2551	13.0252	12.4615	13.5847	12.5738	15.9861	14.3948	15.5263	14.7592	16.2375	17.1623	18.9748
1000	Mean		155.9	164.6	174.7	180.2	187.6	190.6	197.7	201.7	204.3	212.2	220	223	228.3	232.9	236.3	238.3	241.4	241.5
	SD		8.27916	8.16769	8.65448	9.62404	9.02096	8.57904	10.0449	9.29815	8.88257	9.67011	9.69536	10.8628	9.21412	11.4838	11.4314	11.4022	10.9869	11.5012
2000	Mean		156.4	163.9	173.3	179.7	187.6	193	200	201.9	206.6	215.2	221.9	224.9	230.4	234.4	235.5	234.5	242.5	240
	SD		5.23238	6.88719	9.04372	9.73025	10.4902	10.4775	11.0755	12.888	14.3697	15.5192	17.0974	15.9614	17.7088	17.5005	17.148	15.8902	17.5578	17.2948
			NS	NS	NS	NS	NS	NS	NS	NS	NS	NS	NS	NS	NS	NS	NS	NS	NS	NS
Abbreviations: NS, not significant; SD, standard deviation
‡n = 10 for all groups

## Sheet: 2.BWG-F
Supplemental Table 2. Summary of body weight gain between days (females), 90-day study
Group‡		Body weight gain (g) between days																	SUM.
mg/kg bw/day		0-3	3-7	7-10	10-14	14-17	17-21	21-24	24-28	28-35	35-42	42-49	49-56	56-63	63-70	70-77	77-84	84-89	0-89
Control	Mean	9.2	11.5	7.2	6.9	2.5	6.2	4.5	3.1	10.2	6.8	3.9	4.6	5.2	3.3	1.5	0.2	3.8	90.6
	SD	4.2374	2.87711	3.52136	2.88483	3.65908	2.69979	4.45346	2.92309	5.26624	3.79473	3.47851	4.85798	5.97774	4.73873	4.30116	2.89828	4.04969	9.21593
500	Mean	6.4	10	5.6	7	6.7	7.7	5.8	3.7	7.1	6.2	4.9	6.9	-0.1	2.7	2.6	3.8	3.5	90.5
	SD	3.80643	2.94392	5.35828	4.39697	6.23699	3.59166	3.99444	3.71334	3.14289	5.80804	5.48635	4.30633	4.95424	4.78539	5.16828	4.39191	4.55217	16.6416
1000	Mean	8.7	10.1	5.5	7.4	3	7.1	4	2.6	7.9	7.8	3	5.3	4.6	3.4	2	3.1	0.1	85.6
	SD	2.58414	2.42441	3.92287	2.67499	4.71405	2.46982	1.63299	3.23866	2.46982	3.11983	3.43188	3.0203	5.23238	4.83506	4	5.06513	4.06749	8.8594
2000	Mean	7.5	9.4	6.4	7.9	5.4	7	1.9	4.7	8.6	6.7	3	5.5	4	1.1	-1	8	-2.5	83.6
	SD	3.47211	3.09839	5.94792	3.21282	3.68782	2.86744	3.78447	2.71006	2.41293	4.49815	4.39697	4.35252	4.32049	4.81779	3.94405	3.94405	3.97911	15.1965
	SS																**	**
Test for significance		NS	NS	NS	NS	NS	NS	NS	NS	NS	NS	NS	NS	NS	NS	NS	DN	DN	NS
Abbreviations: DN, Duncan's multiple range test; NS, not significant; SD, standard deviation; SS, statistical significance
‡n = 10 for all groups
* p < 0.05, ** p < 0.01

## Sheet: 3.Food Cons
Supplemental Table 3. Summary of food consumption, 90-day study
Group‡			Daily mean food consumption (g/animal/day) on weeks
mg/kg bw/day		Days	0-7	7-14	14-21	21-28	28-35	35-42	42-49	49-56	56-63	63-70	70-77	77-84	84-89
		Weeks	1	2	3	4	5	6	7	8	9	10	11	12	13
Males
Control	Mean		24.6286	23.5143	24.1286	23.3429	23.0857	23.5429	23.3857	23.5143	23.2143	22.7	24.7571	23.2857	25.72
	SD		1.75507	2.03395	1.81884	1.52113	1.39679	1.8636	1.62192	1.77945	1.88712	1.66796	2.00346	1.48156	1.72614
500	Mean		25.5857	24.6857	24.6857	23.9571	23.4714	24.2	23.9714	23.9857	24.3714	23.3857	25.1143	23.4286	25.94
	SD		1.61266	1.92584	1.55882	1.93201	1.86269	1.42571	2.12404	2.05861	2.14571	1.79322	1.89976	1.82574	1.75385
1000	Mean		24.0429	23.8714	24.2	23.3571	23.1857	23.6143	23.1857	23.4857	23.3714	22.1429	24.0429	22.5714	24.88
	SD		1.99097	2.05971	2.8818	2.94796	2.94242	2.88247	3.04319	2.82377	2.77599	2.85476	2.99739	3.06542	3.63465
2000	Mean		24.1571	23.9571	24.1429	23.4571	22.4143	22.6143	22.4429	22.7286	22.4571	22.4571	24.3	22.6714	24.6
	SD		1.89575	1.92023	2.02815	2.13576	2.20744	2.03824	2.74581	2.69244	2.30134	1.54714	1.47918	1.58801	2.00444
Test for significance			NS	NS	NS	NS	NS	NS	NS	NS	NS	NS	NS	NS	NS
Females
Control	Mean		17.2857	15.9286	16.3857	15.7143	15.5	16.1571	15.9429	16.2714	16.1286	15.4143	17.2143	16.5571	17.46
	SD		1.86506	1.36235	1.31458	1.04762	1.32694	1.29266	1.32514	1.38579	1.93365	1.86196	1.86658	1.92778	1.70763
500	Mean		17.1714	16.7	17.5143	16.8429	16.5714	17.1714	16.2429	16.1286	16.3714	15.8857	18.1143	16.8857	18.62
	SD		2.06339	2.33134	2.50912	2.71341	2.80266	2.86886	2.72974	2.63626	2.93018	2.36068	3.83373	3.43571	3.77883
1000	Mean		16.2714	15.7	16.5143	15.0571	14.8714	15.5714	15.2857	15.6857	15.5143	15.1429	17.3	15.9571	16.8
	SD		0.847699	0.8636	0.803055	0.595524	0.377664	0.890871	1.00113	0.734013	0.822584	0.693344	0.934232	1.16458	1.33
2000	Mean		16.4571	16.2714	17.3	15.6	16.1571	16.4571	16.0857	16.3571	15.8857	15.2571	17.4857	16.4286	17.88
	SD		1.08755	1.41814	1.79499	1.53685	1.84606	1.61034	1.95319	2.03401	1.51456	1.95621	2.02165	2.18944	1.96231
Test for significance			NS	NS	NS	NS	NS	NS	NS	NS	NS	NS	NS	NS	NS
Abbreviations: NS, not significant; SD, standard deviation
‡n = 10 for all groups

## Sheet: 4.Feed Eff-F
Supplemental Table 4. Summary of feed efficiency (females), 90-day study
		Feed efficiency (g bw/g food)
Group		Days	0-7	7-14	14-21	21-28	28-35	35-42	42-49	49-56	56-63	63-70	70-77	77-84	84-89	0-89
mg/kg bw/day		Weeks	1	2	3	4	5	6	7	8	9	10	11	12	13	1-13
Control	Mean		6.17277	8.40071	15.0941	19.3608	13.0152	17.3336	32.3264	46.3331	29.5515	21.4697	57.7444	53.4	25.2396	16.054
	SD		1.44662	2.2968	6.92597	15.1771	6.48339	6.51225	29.0305	46.0142	36.9371	8.04724	51.9184	54.2538	17.5269	1.2742
	n†		10	10	10	9	10	9	8	9	8	6	5	3	8	10
500	Mean		8.53386	14.1518	7.91696	17.2453	19.0949	37.2633	20.6611	28.2008	56.2812	33.9754	42.4524	31.3107	37.5143	17.0309
	SD		4.07968	13.2252	2.0472	14.8917	7.96666	35.7729	14.7601	28.1475	69.0417	34.0414	37.6033	29.6443	35.6188	3.43506
	n†		10	10	9	10	10	9	7	10	4	6	7	8	8	10
	SS				**
1000	Mean		6.34483	9.75236	13.7955	17.5448	14.6117	16.5058	41.7577	29.9425	27.6759	38.5333	40.469	59.317	36.2429	16.5313
	SD		1.50355	3.61657	5.54408	8.80612	5.31126	7.66325	29.7915	19.576	28.7904	29.86	36.8846	49.3993	28.6497	1.17454
	n†		10	10	10	9	10	10	8	10	9	8	7	7	4	10
2000	Mean		7.52162	9.52117	10.1806	17.8528	13.7849	34.6024	57.6756	24.7293	43.3958	28.8679	75.4625	24.0684	56.6667	17.7803
	SD		2.5558	4.41333	2.24777	8.12009	2.95387	32.0179	44.7315	14.5916	43.3264	13.9859	54.8983	27.1261	42.8978	2.24886
	n†		10	10	10	9	10	10	8	9	8	6	4	10	2	10
	SS				*
Test for significance			NS	NS	U	NS	NS	NS	NS	NS	NS	NS	NS	NS	NS	NS
Abbreviations: DN, Duncan's multiple range test; NS, not significant; SD, standard deviation; SS, statistical significance; U, Mann-Whitney U-test versus control
†Group ‘n’s were reduced for some weeks due to individual animals either having (0) weight gain or weight loss
* p < 0.05, ** p < 0.01

## Sheet: 5.Hem
Supplemental Table 5. Summary of hematology results, 90-day study
		WBC	NEU	LYM	MONO	EOS	BASO	RBC	HGB	HCT	MCV	MCH	MCHC	PLT	RET	PT	APTT
Group‡		[x109/L]	[%]	[%]	[%]	[%]	[%]	[x1012/L]	[g/L]	[L/L]	[fL]	[pg]	[g/L]	[x109/L]	[%]	[sec]	[sec]
mg/kg bw/day
Males
Control	Mean	6.88	17.87	77.89	1.79	2.07	0.09	8.76	154.9	0.475	54.28	17.75	326.6	679	1.803	10.74	12.96
	SD	1.51276	4.79237	5.20544	0.422821	0.557873	0.0316228	0.488194	6.70738	0.0177951	2.3213	1.13944	8.0719	149.988	0.199558	0.287518	1.63517
500	Mean	5.9	19.9	75.29	1.97	2.48	0.06	8.937	154	0.469	52.44	17.22	328.7	739.1	1.596	10.71	13.39
	SD	1.17473	11.2623	14.9625	0.978718	3.11512	0.0516398	0.222014	5.18545	0.0128668	1.50495	0.608824	6.6675	154.09	0.151819	0.237814	1.67428
	SS										*
1000	Mean	6.42	18.53	77.25	1.93	1.79	0.06	8.624	153.6	0.465	53.98	17.83	330.3	741.3	1.543	10.72	13.54
	SD	1.19796	1.91546	1.9834	0.60928	1.02138	0.0516398	0.409151	4.59952	0.0150923	1.50908	0.883239	8.89507	90.3697	0.244543	0.345768	1.57
															*
2000	Mean	6.15	18.1	78.52	1.74	1.21	0.08	8.762	154.8	0.465	53.02	17.7	334	818.4	1.552	10.79	13.75
	SD	1.38984	5.04469	5.47495	0.579655	0.280674	0.0421637	0.500307	5.71159	0.0184089	1.71904	0.831331	9.00617	111.357	0.34499	0.237814	1.0395
						**									*
Test for significance		NS	NS	NS	NS	U	NS	NS	NS	NS	DN	NS	NS	NS	DN	NS	NS
Historical control range		4.95-11.12	9.7-38.7	56.5-87.8	1.8-5.1	0.3-9.0	0.0-0.2	7.52-10.21	141-180	0.404-0.489	45.4-53.7	16.6-18.8	349-379	595-957	2.05-4.65	16.5-27.3	15.2-31.8
Females
Control	Mean	3.84	22.12	73.29	1.85	2.23	0.1	8.196	148.9	0.455	55.63	18.2	327.2	707.2	2.177	10.04	13.33
	SD	1.00022	7.5113	7.37585	0.653622	0.838053	0.0471405	0.386529	5.13052	0.0164992	1.55638	0.748331	6.87669	151.837	0.341144	0.150555	1.39048
500	Mean	3.89	18.03	78.19	1.71	1.64	0.08	8.088	147	0.446	55.32	18.21	329	786.3	1.926	10.11	13.09
	SD	0.882484	7.17171	7.18338	0.458136	0.805812	0.0788811	0.301323	2.58199	0.0117379	1.36447	0.527994	7.00793	136.061	0.363416	0.260128	1.11798
1000	Mean	4.43	24.98	70.86	2.16	1.49	0.1	8.352	149.4	0.452	53.97	17.91	331.9	892.6	1.8	10.01	13.88
	SD	1.11759	18.6577	19.0327	0.832933	0.372529	0.0816497	0.380462	5.56177	0.0161933	1.43221	0.696738	4.72464	100.137	0.404804	0.0994429	1.79617
	SS													**
2000	Mean	4.36	23.06	72.97	1.99	1.52	0.05	8.21	148.7	0.45	54.69	18.12	331.2	849.4	1.902	10.03	13.51
	SD	0.920386	13.1522	14.6113	0.915848	0.810761	0.0527046	0.253728	5.07828	0.0124722	1.96551	0.806639	6.49444	109.274	0.337599	0.125167	1.41771
	SS													*
Test for significance		NS	NS	NS	NS	NS	NS	NS	NS	NS	NS	NS	NS	DN	NS	NS	NS
Historical control range		2.81-10.66	5.8-33.3	63.4-91.1	1.1-3.9	0.4-2.1	0-0.2	7.71-9.17	148-168	0.415-0.467	47.0-60.1	17.2-20.8	346-372	549-1103	2.77-5.63	16.4-26.7	17.4-27.9
Abbreviations: APTT, activated partial thromboplastin time; BASO, basophils; DN, Duncan's multiple range test; EOS, eosinophils; HCT, hematocrit; HGB, hemoglobin; LYM, lymphocytes; MCH, mean corpuscular hemoglobin; MCHC, mean corpuscular hemoglobin concentration; MCV, mean corpuscular volume; MONO, monocytes; n, number of animals per group; NEU, neutrophils; PLT, platelets; PT, prothrombin time; …
‡n = 10 for all groups

## Sheet: 6.Org Wt
Supplemental Table 6. Summary of absolute organ weights, 90-day study
			Organ weight (g)
Group‡			Body	Brain	Liver	Kidneys	Heart	Thymus	Spleen	Testes/ Uterus	Epididymides/Ovaries	Adrenals
mg/kg bw/day			weight
Males
Control	Mean		453.9	2.203	13.206	2.531	1.034	0.385	0.746	3.687	1.567	0.0585
	SD		37.2035	0.0767463	0.829045	0.267766	0.102002	0.0830328	0.102545	0.357026	0.168658	0.010168
500	Mean		449.4	2.18	12.905	2.505	1.071	0.344	0.691	3.595	1.638	0.0643
	SD		26.2814	0.0886942	1.20373	0.188164	0.0602679	0.0917969	0.0924302	0.254045	0.431478	0.0101658
1000	Mean		435.8	2.12	12.533	2.501	1.068	0.346	0.714	3.532	1.496	0.0621
	SD		52.0124	0.104137	1.64996	0.277947	0.129855	0.0660303	0.140965	0.474243	0.106583	0.0106087
2000	Mean		408.3	2.121	12.185	2.48	0.934	0.333	0.668	3.597	1.481	0.0655
	SD		29.9817	0.0757848	1.38361	0.222211	0.0822192	0.0928619	0.0651153	0.21203	0.111798	0.00931248
	SS		*				*
Test for significance			DN	NS	NS	NS	DN	NS	NS	NS	NS	NS
Historical control range			344-488	1.81-2.39	7.95-14.14	1.79-2.73	0.97-1.50	0.23-0.84	0.26-0.96	2.58-4.20	1.39-1.93	0.047-0.097
Females
Control	Mean		239.3	1.965	6.374	1.578	0.719	0.281	0.438	0.766	0.0948	0.0793
	SD		15.8328	0.0650214	0.665853	0.281101	0.0699921	0.0467737	0.0458984	0.162084	0.0188019	0.0114509
500	Mean		242	1.956	6.97	1.55	0.7	0.28	0.454	0.674	0.0895	0.0835
	SD		16.1864	0.102762	0.882106	0.14922	0.0809664	0.0323179	0.0707421	0.144776	0.0122134	0.0126776
1000	Mean		234.3	1.932	6.432	1.517	0.675	0.276	0.416	0.669	0.083	0.0765
	SD		11.2945	0.0617882	0.37499	0.0639531	0.0263523	0.0442719	0.0542013	0.161758	0.0113333	0.00721495
2000	Mean		236.8	1.894	6.824	1.564	0.687	0.265	0.432	0.573	0.0891	0.0759
	SD		17.6119	0.0702693	0.63077	0.1784	0.0588878	0.0566176	0.0694102	0.113534	0.0149403	0.00638488
	SS									**
Test for significance			NS	NS	NS	NS	NS	NS	NS	DN	NS	NS
Historical control range			206-285	1.75-2.18	5.30-7.97	1.23-2.00	0.66-0.96	0.24-0.54	0.33-0.75	0.40-2.07	0.098-0.208	0.063-0.113
Abbreviations: DN, Duncan's multiple range test; NS, not significant; SD, standard deviation; SS, statistical significance
‡n = 10 for all groups

## Sheet: 7.Org Bdy
Supplemental Table 7. Summary of organ weight relative to body weight, 90-day study
		Organ weight relative to body weight (%)
Group‡		Brain	Liver	Kidneys	Heart	Thymus	Spleen	Testes/ Uterus	Epididymides/Ovaries	Adrenals
mg/kg bw/day
Males
Control	Mean	0.487546	2.91804	0.557987	0.227974	0.0850648	0.164039	0.813461	0.348014	0.0129281
	SD	0.033091	0.177325	0.0411382	0.0148291	0.0193342	0.0137212	0.060846	0.0518925	0.00226443
500	Mean	0.485915	2.87165	0.55727	0.238653	0.0769576	0.154455	0.800253	0.363475	0.0143692
	SD	0.021784	0.214619	0.0257032	0.01284	0.0213073	0.0235329	0.0390302	0.0844183	0.00244767
1000	Mean	0.491087	2.88267	0.575594	0.245135	0.0793848	0.162998	0.812621	0.346258	0.0144053
	SD	0.0468673	0.25487	0.0361764	0.00827918	0.0117292	0.0201888	0.0828686	0.0343305	0.00288802
					**
2000	Mean	0.521442	2.98374	0.608979	0.228967	0.082091	0.163875	0.883824	0.364966	0.0161166
	SD	0.0335919	0.254937	0.0550791	0.0150673	0.0242425	0.0146716	0.0618452	0.0444374	0.00250806
	SS	*		*				*		*
Test for significance		DN	NS	DN	DN	NS	NS	DN	NS	DN
Historical control range		0.441-0.599	1.916-3.108	0.466-0.650	0.216-0.311	0.057-0.191	0.058-0.219	0.642-1.011	0.320-0.512	0.012-0.023
Females
Control	Mean	0.824689	2.6595	0.659385	0.300539	0.117552	0.183107	0.321596	0.03941	0.0331385
	SD	0.065728	0.148241	0.106451	0.0220886	0.0191491	0.0157936	0.0727148	0.0057955	0.00422767
500	Mean	0.811533	2.8814	0.642093	0.289535	0.116033	0.18754	0.281378	0.0371822	0.0344817
	SD	0.0702453	0.317549	0.0648375	0.0298378	0.0138887	0.0248103	0.0710167	0.00617212	0.00463888
	SS		*
1000		0.826311	2.74857	0.648263	0.288694	0.1177	0.177311	0.286856	0.0356357	0.0328058
	Mean	0.0483071	0.173269	0.0299805	0.0179042	0.0174697	0.0192519	0.0753644	0.00614387	0.00429925
	SD
2000	Mean	0.803298	2.88322	0.659739	0.290351	0.111719	0.181747	0.242585	0.0375753	0.0321341
	SD	0.0595097	0.176011	0.0459618	0.0179027	0.0195859	0.0197477	0.0498401	0.00537032	0.0027392
	SS		*					*
Test for significance		NS	DN	NS	NS	NS	NS	DN	NS	NS
Historical control range		0.681-0.943	2.172-3.214	0.530-0.752	0.273-0.396	0.093-0.217	0.140-0.298	0.167-0.852	0.043-0.086	0.026-0.044
Abbreviations: DN, Duncan's multiple range test; NS, not significant; SD, standard deviation; SS, statistical significance
‡n = 10 for all groups

## Sheet: 8.Org Bdy Brn
Supplemental Table 8. Summary of organ and body weights relative to brain weight, 90-day study
		Organ weight and body weight relative to brain weight (%)
Group‡		Body	Liver	Kidneys	Heart	Thymus	Spleen	Testes/ Uterus	Epididymides/Ovaries	Adrenals
mg/kg bw/day		weight
Males
Control	Mean	20595	599.451	114.756	46.8932	17.5073	33.8132	167.174	71.268	2.64866
	SD	1382.05	31.0667	9.77463	3.72892	3.94282	3.97425	12.6121	8.47848	0.405902
500	Mean	20618.5	591.177	114.845	49.1669	15.7681	31.7185	165.008	75.2193	2.94702
	SD	960.359	37.7681	6.45711	2.76315	4.0526	4.22601	11.2436	20.0489	0.42102
1000	Mean	20549.3	591.362	117.992	50.3631	16.3112	33.5833	166.73	70.5636	2.93933
	SD	2184.73	73.5622	12.0193	5.54386	2.90956	6.01068	21.7306	3.53057	0.567376
2000	Mean	19251.1	574.291	116.888	44.017	15.7472	31.5032	169.741	69.9397	3.08913
	SD	1271.46	59.657	9.02056	3.24992	4.51136	2.99465	11.101	6.2786	0.419135
Test for significance		NS	NS	NS	NS	NS	NS	NS	NS	NS
Historical control range		16681-22689	371.5-660.20	91.59-131.25	43.53-65.22	10.45-38.18	11.82-41.71	129.65-186.05	63.76-98.40	2.19-4.32
Females
Control	Mean	12193.5	324.64	80.6244	36.6317	14.3261	22.3023	38.9188	4.82559	4.04216
	SD	946.26	34.6761	16.5692	3.86841	2.48629	2.39447	7.64069	0.936669	0.616573
500	Mean	12401.4	357.262	79.4169	35.8235	14.3489	23.1997	34.4057	4.59657	4.27669
	SD	1017.81	48.8197	8.41308	4.00056	1.81603	3.34767	6.81057	0.715998	0.666355
1000	Mean	12137.9	333.211	78.581	34.9817	14.2855	21.5604	34.6752	4.30518	3.96808
	SD	683.791	22.1725	3.923	2.02721	2.25537	2.94265	8.51077	0.639592	0.450171
2000	Mean	12509.9	360.171	82.6192	36.313	13.9733	22.7987	30.4288	4.70273	4.0124
	SD	920.121	28.19	9.14794	3.33822	2.76464	3.50441	6.83287	0.743007	0.367089
	SS		*
Test for significance		NS	DN	NS	NS	NS	NS	NS	NS	NS
Historical control range		10600.0-14658.7	276.04-412.95	65.08-104.71	33.65-49.74	11.82-27.55	17.84-38.34	18.96-99.52	5.19-10.79	3.12-5.49
Abbreviations: DN, Duncan's multiple range test; NS, not significant; SD, standard deviation; SS, statistical significance
‡n = 10 for all groups
